39 are common in preterm born children and adults, with a high prevalence of attention disorders and  
40 autism spectrum disorder (4,13–19). Given the increasing prevalence of preterm birth, identifying the  
41 mechanisms of preterm birth-related brain injury, along with early prognostic markers of increased  
42 risk for neurodevelopmental and neurocognitive disorders are vital for improving health outcomes of  
43 preterm individuals.

44 Electroencephalography (EEG) has been increasingly used in the clinical setting, both for prognostic  
45 and diagnostic purposes (20–23). EEG is non-invasive and as little as 40 s of recording is sufficient  
46 to construct basic measures of neural activity, such as neural oscillations (periodic) and background  
47 (aperiodic) neural activity (24). Both periodic and aperiodic components of the EEG power spectra  
48 show developmental changes, with spectral power decreasing in low frequency power bands and the  
49 slope of aperiodic component flattening (25–27). Both components have been used as a diagnostic  
50 and prognostic tool in the preterm population, with varying success (17,22,24,28–31). It is currently  
51 unknown how preterm birth affects EEG components in healthy preterm born infants outside of the  
52 neonatal intensive care unit (NICU) setting.

53 Increasing use of animal models that replicate electrophysiological signatures of preterm birth-related  
54 brain injury, such as hypoxia, has aided in identifying the cellular and circuit changes after preterm  
55 birth (32–35). Very early preterm infants and hypoxic mice share common neural deficits, such as  
56 impaired development and integration of cortical interneurons (36–39). Animal models of preterm  
57 birth itself are less commonly studied, likely due to low viability (40–42). Previous research has  
58 shown that preterm cesarean delivery does not result in neurobehavioral impairments (43), but the  
59 commonalities in electrical activity of the brain between preterm mice and preterm infants have not  
60 yet been identified.

61 In this study, we used EEG in healthy preterm infants and *in vivo* electrophysiology in preterm born  
62 mice to identify changes in periodic and aperiodic neural activity associated with prematurity. We  
63 focused our study on the visual brain areas, as they are well characterized anatomically and  
64 functionally in both humans and mice (44–53). We find that the aperiodic 1/f component slope is  
65 significantly flatter in both preterm infants and mice, indicating accelerated brain maturation. Using  
66 preterm mice, we identify increased inhibition in the preterm brain and point to a new mechanism  
67 that mediates preterm birth-related changes in neural activity.

## 68 **Method**

69 *Infants.* Sixty-eight preterm infants recruited from the University of Virginia NICU and 75 term-born  
70 infants recruited from the greater Charlottesville area completed a resting-state EEG paradigm as part  
71 of a larger, ongoing study. Infants in the NICU participated in the study as soon as their health  
72 condition was deemed sufficiently stable by their neonatology care team. Term-born infants were  
73 invited to participate from birth to 4 months of age. The primary caregiver of the infant provided  
74 written informed consent for a protocol approved by the University of Virginia (UVA) Institutional  
75 Review Board (HSR210330 or HSR19514, principal investigator: Puglia). Families were  
76 compensated \$50 for their participation.

77 *EEG acquisition and preprocessing.* Resting-state EEG was recorded from 32 Ag/AgCl active  
78 actiCAP slim electrodes (Brain Products GmbH, Germany) affixed to an elastic cap according to the  
79 10–20 electrode placement system (Figure 1A) while the infant rested in a caregiver’s arms for up to  
80 7 min. EEG was amplified with a BrainAmp DC Amplifier and recorded using BrainVision Recorder  
81 software with a sampling rate of 5000 Hz, online referenced to FCz, and online band-pass filtered

82 between 0.01 and 1000  $\square$ Hz. Data were preprocessed with an automated preprocessing pipeline for  
83 pediatric EEG data using EEGLab v2021.1 software with quality assurance via manual inspection:  
84 data were down-sampled to 500 Hz, band-pass filtered from 0.1-100 Hz, and segmented into 10s  
85 epochs (54,55). Epochs with a voltage exceeding  $\pm 500 \square \mu$ V were rejected. The data was then  
86 decomposed via independent components analysis and artifactual components ( $M = 6.39$ ,  $SD = 3.90$ )  
87 were removed (56,57). Epochs with amplitude standard deviations exceeding  $80 \square \mu$ V within a 200-  
88 ms sliding window with a 100-ms window step were discarded and problematic channels were  
89 interpolated ( $M = 0.84$ ,  $SD = 0.83$ ) (58). Finally, the 6 epochs with a total global field power (GFP)  
90 closest to the median GFP for each participant were selected for spectral analysis. Thirty-eight  
91 preterm and 30 term-born infants had sufficient, artifact-free data after preprocessing. An additional  
92 11 infants (9 preterm) were excluded due to high line noise (60 Hz) contamination and mean signal  
93 amplitude  $< 1 \mu$ V. See Table 1 for participant demographic and perinatal characteristics.

94 *Mice.* Mice were maintained on C57BL/6 background (The Jackson Laboratory, Bar Harbor, ME) on  
95 standard 12:12 light:dark cycle, with food and water *ad libitum*. Animals from both sexes were used  
96 during the 4<sup>th</sup> week after birth. Preterm mice were generated through timed breedings, where the day  
97 after the pairing was considered as gestational day (GD) 0. Once the pregnancy was confirmed  
98 ( $>1.5$ g increase in weight at GD 10), pregnant dams were habituated to handlers by daily handling.  
99 Mifepristone (MFP, Milipore Sigma, Burlington, MA) was dissolved in DMSO and  $150 \mu$ g was  
100 injected subcutaneously on GD 17. Preterm mice were delivered on GD 18. The cage with preterm  
101 mice was supplemented with external heat and occasional oxygen to prevent hypothermia and  
102 hypoxia, commonly observed in preterm mice. Control term mice were obtained from timed pregnant  
103 dams injected with DMSO only on GD 17. Animals were treated in accordance with the University  
104 of Virginia Institutional Animal Care and Use Committee guidelines.

105 *Immunohistochemistry and imaging.* Term and preterm mice (aged 35-40 days,  $N=3-6$ /group, as  
106 indicated in text and figure legends) were anesthetized with a mixture of ketamine and xylazine and  
107 transcranially perfused with warm 0.1 M phosphate buffer, followed by warm 4% paraformaldehyde  
108 (Electron Microscopy Sciences, Hatfield, PA). Brains were postfixed 1 hr at room temperature,  
109 followed by overnight fixation at 4°C. Brains were sectioned into  $40 \mu$ m sections using a vibratome  
110 and stored in 1x phosphate buffered saline (PBS) and 0.01% sodium azide. For  
111 immunohistochemistry, sections were rinsed in PBS, non-specific binding was blocked with 3%  
112 normal horse serum (heat inactivated, ThermoFisher, Waltham, MA) and 0.3% Triton-X 100 (Sigma-  
113 Aldrich) in PBS (sterile filtered). Antibodies were incubated overnight at 4°C. Parvalbumin (anti-  
114 goat) was used at 1/200 (Swant, Belinzona, Switzerland) and detected with donkey anti-goat Alexa  
115 647 (ThermoFisher). NeuN and GAD65/67 were both anti-rabbit (Milipore Sigma) and were used  
116 with secondary NanoTag reagents (FluoTag X2 Atto 488 and Alexa 647) according to the  
117 manufacturer's protocol (NanoTag Biotechnologies, GmbH, Goettingen, Germany). After staining,  
118 sections were rinsed in distilled water, mounted on glass slides, briefly dried, and coverslipped with  
119 Aquamount (Polysciences, Warrington, PA). Images were acquired using Zeiss LSM 800 at  
120 2048x2048 resolution. Single optical sections from the visual cortex using 63x 1.2 NA C-  
121 Apochromat were acquired for GAD65/67 quantification, and z-stacks were acquired using 40x1.2  
122 NA Plan-Apochromat for Parvalbumin intensity quantification. Images were collected from 4-6  
123 sections/mouse (minimum 20 images/mouse). Quantification was performed on background  
124 subtracted images using ImageJ. Automatic thresholding was applied to GAD65/67 images before  
125 using the puncta analyzer function on NeuN-outlined neuronal cell bodies.

126 *In vivo electrophysiology in mice.* Recordings were performed on awake term and preterm ( $N=9$  and  
127 6, respectively) female and male mice, ages 21 to 28 days after birth, using a treadmill as described in

128 (Niell and Stryker, 2010). Four to seven days before the recording session, custom made stainless  
129 steel head-plate implants were cemented to the mouse skull. Animals were anesthetized with  
130 isoflurane in oxygen (2% induction, 1.0–1.8% maintenance), warmed with a heating pad at 38°C and  
131 given subcutaneous injections of Buprenorphine SR (1mg/kg) and 0.25% Bupivacaine (locally). Eyes  
132 were covered with Puralube (Decra, Northwich, UK). Scalp and fascia from Bregma to behind  
133 lambda were removed, and the skull was cleaned, dried and covered with a thin layer of Scotchbond  
134 adhesive (3M, Maplewood, MN). Skin edges were sealed with VetBond (3M). The head plate was  
135 attached with dental cement (RelyX Ultimate, 3M). The well of the head plate was filled with  
136 silicone elastomer (Reynold Advanced Materials, Brighton, MA) to protect the skull before  
137 recordings. Animals were group housed after the implantation and monitored daily for signs of shock  
138 or infection. Two to three days before the recording, the animals underwent one to two 20-30 minutes  
139 handling sessions and one to two 10-20 minutes sessions in which the animals were habituated to the  
140 treadmill (Dombeck et al., 2007). On the day of recording, the animals were anesthetized as above  
141 and small craniotomies (~0.5 mm in diameter) with 18G needles were made above V1 (2-3 mm  
142 lateral to midline, 0.5-1 mm anterior to lambda) and cerebellum. The brain surface was covered in 2-  
143 3% low melting point agarose (Promega, Madison, WI) in sterile saline and then capped with silicone  
144 elastomer. Animals were allowed to recover for 2–4 h. For the recording sessions, mice were placed  
145 in the head-plate holder above the treadmill and allowed to habituate for 5-10 minutes. The agarose  
146 and silicone plug were removed, the reference insulated silver wire electrode (A-M Systems,  
147 Carlsborg, WA) was placed in cerebellum and the well was covered with warm sterile saline. A  
148 multisite electrode spanning all cortical layers (A1x16-5mm-50-177-A16; Neuronexus Technologies,  
149 Ann Arbor, MI) was coated with DiI (Invitrogen) to allow post hoc insertion site verification and  
150 then inserted in the brain through the craniotomy. The electrode was lowered until the uppermost  
151 recording site had entered the brain and allowed to settle for 20-30 minutes. The well with the  
152 electrode was then filled with 3% agarose to stabilize the electrode and the whole region was kept  
153 moist with surgical gelfoam soaked in sterile saline (Pfizer, MA). Minimum 2 penetrations were  
154 made per animal to ensure proper sampling of the craniotomy. After the recording, mice were  
155 euthanized with an overdose of ketamine and xylazine or kept for subsequent experiments after  
156 protecting the craniotomy with silicone elastomer.

157 *Data collection and analysis for mice.* Blank screen was generated with MATLAB (MathWorks,  
158 Natick, MA) using the Psychtoolbox extension (Brainard, 1997) and presented on a gamma corrected  
159 27" LCD. The screen was centered 25 cm from the mouse's eye, covering ~80° of visual space. The  
160 signals were sampled at 25 kHz using Spike2 and data acquisition unit (Power 1401-3, CED). Signals  
161 were fed into a 16-channel amplifier (Model 3500; A-M Systems), amplified 200x and band-pass  
162 filtered 0.7-7000 Hz. Only stationary, non-running stages were analyzed offline using Spike2  
163 software (CED). For single unit analysis, spikes were extracted from band-pass filtered data (all 16  
164 channels) using thresholds (3x standard deviation) and sorted in Spike 2. For spectral analyses, layer  
165 2/3 was selected due to its high correlation with EEG signal (59). 60 s epochs of data during viewing  
166 of the blank screen were selected and downsampled to 500 Hz prior to spectral analysis to match the  
167 infant data.

168 *Quantification and statistical analysis.* All analyses were performed with the researchers blind to the  
169 condition. Statistical analyses were performed in GraphPad Prism 9.0 (GraphPad Inc., La Jolla, USA)  
170 using nested t-test and one or two-way ANOVA with post-hoc comparisons (as indicated in text and  
171 figure legends), unless stated otherwise. Spectral analysis was performed with Spike2 on 60 s of data  
172 at 500 Hz for both infant and mouse datasets. Power was normalized to the power in high frequency  
173 band (150-250 Hz). Power spectral density values were averaged across channels of interest (Figure  
174 1A). 1/f slope was generated using linear regression from 0.1-100 Hz after log-transform of

175 frequency and power. All data are reported as mean  $\pm$  SEM, where N represents number of animals  
176 and infants used, unless indicated otherwise. Target power for all sample sizes was 0.8. In all cases,  
177 alpha was set to 0.05.

## 178 **Results**

179 Neurocognitive and visual deficits are common in preterm children (60–65), but they are often  
180 diagnosed in school age, precluding early interventions (66–68). To identify early postnatal  
181 biomarkers of impaired activity in visual areas, we used electroencephalography (EEG) to measure  
182 resting state activity in the occipital and parietal visual areas within the first 4 months of life in  
183 preterm and term-born infants. All data were collected prior to the onset of the critical period for the  
184 development of binocularity at 6 months of age (69), a visual function that is highly sensitive to  
185 altered perinatal experience (69–71). Sixty seconds of resting state EEG data from occipital and  
186 parietal electrodes (Figure 1A) were collected from 29 preterm and 28 term infants. While the  
187 preterm infants had a typical distribution of high power in low frequencies and low power in high  
188 frequencies (Figure 1 B-C), power in theta and alpha bands was significantly reduced in preterm  
189 infants (Figure 1B).

190 As visual function matures earlier in preterm infants (71), we then asked if the electrophysiological  
191 activity of the visual cortex would reflect this accelerated maturation. To test this, we calculated the  
192 slope of aperiodic EEG component 1/f (Figure 1C). 1/f is thought to reflect the background activity  
193 of the brain (72), and 1/f slopes become progressively flatter during infancy (25). As previously  
194 reported (25), we found that the power spectra of term and preterm infants were largely aperiodic  
195 (Figure 1C). However, we found that preterm infants had a significantly flatter 1/f slope when  
196 compared to term infants, despite preterm infants being significantly younger in postmenstrual age  
197 ( $t(55) = -6.66, p < .001$ ) and equivalent in chronological age ( $t(55) = -0.75, p = .455$ , see also Table  
198 1). These results confirmed accelerated maturation of visual areas in preterm infants (71).

199 To study the effects of preterm birth on the maturation of visual areas in cellular details, we used  
200 prematurely-born mice as a model of preterm birth (73). Preterm mice were generated through  
201 subcutaneous injections of progesterone antagonist mifepristone (MFP) to timed-pregnant dams at  
202 GD 17 (Figure 2A)(41). Preterm mice are born a 0.75-1 day early (depending on the precise  
203 parturition time), have a significantly lower birth weight (Figure 2B), and increased mortality rates  
204 due to hypothermia, hypoxia, and inability to suckle (1-3 pups/litter). However, surviving pups are  
205 otherwise viable and display a catch-up growth typical of preterm-born infants (Figure 2C) (74).  
206 Preterm mice open their eyes significantly earlier, further suggesting accelerated development of  
207 visual brain areas after preterm birth (Figure 2D). To confirm that electrophysiological activity of  
208 visual areas in preterm mice recapitulates changes seen in preterm infants (Figure 1C) , we used *in*  
209 *vivo* electrophysiology to record intracortical local field potentials (LFPs) in layer 2/3 of the primary  
210 visual cortex (V1) of awake, young term and preterm mice (Figure 2E) (75). We used mice in their  
211 fourth week of postnatal development as that period represents the onset of the critical period for  
212 binocular maturation in mice (76). There was a significant interaction between the timing of birth and  
213 the energy composition of the power spectra (Figure 2F), but post-hoc tests revealed no significant  
214 differences within any of the power bands, likely due to lower number of mice used for the  
215 experiments (Figure 2F, compare to Figure 1B). However, preterm mice also had a significantly  
216 flatter 1/f slope (Figure 2G), indicating accelerated maturation of the primary visual cortex and  
217 suggesting the relative conservation of the effects of prematurity on neural activity in mice and  
218 humans.

219 The fourth postnatal week represents a critical transition towards visually-driven activity in mice,  
220 reflected in increasing suppression of spontaneous activity by rising levels of inhibitory  
221 neurotransmission (51,77). Given the flatter, “older” 1/f slope in preterm mice (Figure 2F-G), we  
222 hypothesized that the spontaneous firing rates of visual cortex neurons would be lower in preterm  
223 mice reflecting accelerated transition to visually-driven activity. We isolated single unit responses  
224 from all layers of the cortex (Figure 3A) and estimated their firing rates in stationary, awake mice  
225 whose eyes were centered on a blank, grey screen (Figure 2E). We indeed found a significantly  
226 reduced spontaneous firing rate of visual cortex neurons in preterm mice (Figure 3B). To probe the  
227 cellular mechanism of reduced spontaneous firing in preterm mice, we quantified the expression of  
228 inhibitory synapse marker glutamic acid decarboxylase 65/67 (GAD65/67) (78–80). The number and  
229 size of perisomatic GAD65/67 puncta are a reliable indicator of inhibitory neurotransmission levels  
230 (80). In agreement with suppressed spontaneous activity in preterm visual cortex, the size of  
231 perisomatic GAD65/67 puncta was significantly increased in preterm mice (Figure 3 E-D), with no  
232 changes in their density (Term=15.62±0.4, Preterm=14.98±0.88 puncta/100  $\mu\text{m}^2$  of NeuN+ soma;  
233 N=6 and 5 mice). Cortical perisomatic inhibition is mediated by fast-spiking, Parvalbumin-  
234 expressing interneurons (81). As previous studies of preterm birth-related brain injury models  
235 reported changes in Parvalbumin interneuron distribution and density (36,37,82), we then asked if  
236 this neuronal population is affected by preterm birth. Cortical interneurons represent a mixture of  
237 high, middle and low Parvalbumin (PV)-expressing interneurons (83), with low PV interneurons  
238 being the dominant group in the developing brain and high PV in the mature brain (83). In agreement  
239 with accelerated maturation of the visual cortex, preterm mice had a significantly higher proportion  
240 of high PV interneurons (Figure 3 E-F), without any changes in the overall density of PV  
241 interneurons (Term=22.45±3.53, Preterm=23.79±2.56 PV interneurons per field of view, N=5 term  
242 and 3 preterm mice). Altogether, these results demonstrate accelerated maturation of the visual cortex  
243 after preterm birth and suggest a central role of inhibition in this process.

## 244 Discussion

245 Despite extensive research, effects of premature birth on cortical activity in the early postnatal period  
246 remain unclear. Through a comparative approach, our study identifies accelerated maturation of  
247 neural activity in the visual cortex of preterm infants and mice. Our study further suggests that  
248 elevated levels of inhibition are central to mediating the changes in neural activity after preterm birth.

249 Cortical oscillatory activity shows distinct developmental patterns, with a reduction in the relative  
250 power of low frequencies and an increase in high frequencies with increasing age (26,84). Such  
251 distribution of powers is likely responsible for the age-related flattening of 1/f EEG slope (25,27). An  
252 “older” spectral profile in preterm infants and mice is in agreement with the notion that premature  
253 exposure to extrauterine environment accelerates brain maturation, at least in primary sensory areas  
254 such as the visual cortex (71). As primary sensory areas mature earlier than the frontal executive and  
255 association areas (85), it will be important to determine if the accelerated maturation of sensory areas  
256 impairs the sequence of cortical maturation, especially considering the high prevalence of executive  
257 function disorders in preterm children (86,87).

258 Fast-spiking, Parvalbumin interneurons are central for the maturation of cortical circuits (85,88).  
259 Their functional development is sensitive to experience and in the visual cortex, their maturation can  
260 be accelerated or delayed through manipulations of visual input (89–91). In agreement, our results  
261 suggest that premature onset of visual input can accelerate the maturation of cortical Parvalbumin  
262 interneurons, shifting their distribution to high-PV expressing interneurons in preterm mice. Previous  
263 studies of hypoxic mouse models of preterm birth have demonstrated that hypoxia results in reduced  
264 density of Parvalbumin interneurons, as well as in an increase in the intensity of Parvalbumin signal

265 (91). The differing findings in our study are likely due to low or absent hypoxia in our mouse model,  
266 as well as differences in how the preterm brain injury is modelled. Hypoxia models of preterm birth  
267 are commonly term-born, with continuous or intermittent exposure to hypoxia during the postnatal  
268 development (38,91–93). While hypoxia represents a severe injury, it may not recapitulate the effects  
269 of preterm birth alone. Birth itself is an environmental shock that can significantly affect neuronal  
270 and synaptic development (73,94). As the effects of preterm birth in the absence of other pathologies  
271 are unclear, our results highlight a need for multiple animal models to capture the variability in the  
272 degree of preterm birth-related brain injury.

273 Another potential cause of divergence between our findings in preterm mice and previously  
274 published findings on interneuronal populations (38,95) in preterm infant cortex is the degree of  
275 prematurity. The most vulnerable population of preterm infants are born extremely early, prior to  
276 week 28 of gestation, and very early (28–32 weeks of gestation). These are also the infants that show  
277 deficits in cortical interneurons (36,38,95,96). Yet, the majority (>70%) of preterm infants are born  
278 moderately to late preterm (32–37 weeks of gestation), with variable degrees of health complications,  
279 including hypoxic brain injury (97,98). Infants in our study reflect this, with 51.7% born moderately  
280 to late preterm (Table 1). Considering the relatively high viability of preterm mice, our results  
281 suggest that mice born a day early are a model of middle to late preterm birth. As early and late  
282 preterm infants have similarly poor neurocognitive outcomes (18,67,86,97), our study points to  
283 potentially divergent neural circuit mechanisms of impaired brain function in early and late preterm  
284 infants.

285 Term-born mouse pups in the first postnatal week are commonly compared to preterm newborns,  
286 based on cortical development milestones (52,99). While direct comparison between developmental  
287 stages of mice and humans is difficult due to different rates of maturation, our results confirm  
288 previous findings of accelerated brain maturation after premature birth (73,94). Our results further  
289 highlight the utility of simple EEG measures in the clinical setting and set the stage for future  
290 longitudinal studies that will explore the relationship between 1/f slope and neurodevelopmental  
291 outcomes in the preterm population. Our study adds to the growing body of evidence that birth itself  
292 is a critical transition in brain development. Future studies will undoubtedly explore how the timing  
293 of this transition affects sensory and cognitive processing, given that preterm infants are at higher  
294 risk for developing neurodevelopmental and neuropsychiatric disorders (87).

## 295 **Conflict of Interest**

296 The authors declare that the research was conducted in the absence of any commercial or financial  
297 relationships that could be construed as a potential conflict of interest.

## 298 **Author Contributions**

299 AR and MHP conceived and designed the study. AR acquired and analyzed data collected from mice,  
300 and MHP, MN, WC, AB, and AD acquired and analyzed data collected from infants. EM analyzed  
301 data collected from mice and infants. IW, TDH and CS collected and analyzed the  
302 immunohistochemistry data. AR wrote the manuscript with input from all authors.

## 303 **Funding**

304 AR, IW, TDH, CS and EM are funded through the Department of Psychology at the University of  
305 Virginia. Research reported in this publication was supported in part by the National Center For  
306 Advancing Translational Sciences of the National Institutes of Health under Award Numbers

307 KL2TR003016/ULTR003015 to AR, The National Institutes of Mental Health K01MH125173 to  
 308 MHP, and The Jefferson Trust Foundation to MHP. The content is solely the responsibility of the  
 309 authors and does not necessarily represent the official views of the National Institutes of Health.

### 310 Acknowledgments

311 The authors would like to thank the Cang and Liu labs at the Departments of Biology and  
 312 Psychology for generous access to their confocal microscope, Drs. Zanelli and Fairchild at the  
 313 University of Virginia Children’s Hospital for their assistance identifying candidate participants in  
 314 the NICU, and the participating families for taking part in our research.

### 315 Data Availability Statement

316 The datasets generated and analyzed in this study will be provided upon reasonable request.

### 317 Table 1. Participant demographic and perinatal characteristics

318

|                                    | <b>Preterm infants</b><br>(n = 29) | <b>Term infants</b><br>(n = 28) |
|------------------------------------|------------------------------------|---------------------------------|
| GA (weeks), mean $\pm$ SD          | 31.4 $\pm$ 3.4                     | 39.2 $\pm$ 0.9                  |
| Extremely preterm (<28 weeks)      | 6 (20.7%)                          | -                               |
| Very preterm (28-32 weeks)         | 8 (27.6%)                          | -                               |
| Moderate preterm (32-34 weeks)     | 4 (13.8%)                          | -                               |
| Late preterm (34-37 weeks)         | 11 (37.9%)                         | -                               |
| Early term (37-39 weeks)           | -                                  | 6 (21.4%)                       |
| Full term (39-41 weeks)            | -                                  | 22 (78.6%)                      |
| Late term (>41 weeks)              | -                                  | -                               |
| PMA at test (weeks), mean $\pm$ SD | 39.0 $\pm$ 5.4                     | 47.9 $\pm$ 4.6                  |
| CA at test (weeks), mean $\pm$ SD  | 7.5 $\pm$ 6.8                      | 8.7 $\pm$ 4.4                   |
| <b>Sex</b>                         |                                    |                                 |
| Female (%)                         | 16 (55%)                           | 15 (54%)                        |
| Male (%)                           | 13 (45%)                           | 13 (46%)                        |
| <b>Race</b>                        |                                    |                                 |
| White (%)                          | 23 (79%)                           | 21 (75%)                        |
| Black (%)                          | 5 (17%)                            | 1 (3.5%)                        |
| More than 1 race (%)               | 1 (3%)                             | 5 (18%)                         |
| Unknown race (%)                   | -                                  | 1 (3.5%)                        |
| <b>Delivery method</b>             |                                    |                                 |
| Vaginal (%)                        | 9 (31%)                            | 18 (71%)                        |



|                                     |            |             |
|-------------------------------------|------------|-------------|
| Cesarean (%)                        | 20 (69%)   | 7 (25%)     |
| Unknown                             | -          | 1 (4%)      |
| Birth weight (grams), mean $\pm$ SD | 1681 (664) | 3652 (817)* |
| SGA (%)                             | 6 (20%)    | -.*         |
| APGAR at 5 min, median (min, max)   | 7 (2, 8)   | 8 (6, 9)*   |

319 Data are expressed as sample size unless otherwise stated. GA, gestational age; PMA, postmenstrual  
320 age; CA, chronological age; SGA, small for gestational age, defined as  $< 10^{\text{th}}$  percentile.  
321 \*Birthweight was not available for 1 term infant; Apgar scores were not available for 4 term infants.

## 322 Figure legends

323 **Figure 1. A)** EEG cap montage. Highlighted parietal and occipital channels are analyzed. **B)** Preterm  
324 birth significantly reduces resting theta and alpha band power. Two-way ANOVA interaction:  
325  $p=0.039$ ;  $F(4, 220) = 2.55$ ;  $N= 29$  preterm and 28 term-born infants. Sidak's multiple comparisons  
326 test: theta  $p<.0001$ , alpha  $p=.022$ . **C)** Preterm infants have a significantly flatter slope of log  
327 transformed 2-25 Hz power. Linear regression; slope and  $r^2$  values are indicated. Data shown as mean  
328 or mean $\pm$ SEM.

329 **Figure 2. Preterm mice display a flatter slope of aperiodic LFP component. A)** Preterm mice are  
330 generated through the injection of Mifepristone (dissolved in DMSO) to pregnant dams at  
331 postconceptional day 17. Dams deliver pups within 24 hrs (1 day early: postnatal day/P 0). Term  
332 controls are generated by injecting pregnant dams at postconceptional day 17 with DMSO. **B)**  
333 Preterm pups show a significantly lower birth weight ( $N=29$  term and 37 preterm mice, t-test,  
334  $t(64)=5.63$ ,  $p<0.0001$ ) and **C)** an accelerated postnatal growth rate (ordinary two-way ANOVA,  $F(1,$   
335  $433) = 98.53$ ,  $p<0.0001$ ;  $N=29$  term and 19 preterm mice and **D)** precocious eye opening (t-test,  
336  $t(25)=7.95$ ,  $p<0.0001$ ;  $N=16$  term and 11 preterm mice). **E)** Schematics of in vivo electrophysiology  
337 in awake mice. Local field potentials (LFPs) are collected using linear silicone probes (Neuronexus).  
338 Scale bar: 10  $\mu$ V and 0.1 s. **F)** Preterm birth significantly affects the distribution of power across  
339 different frequency bands (two-way ANOVA,  $F(4, 56) = 2.568$ ,  $p = .048$ ;  $N=6$  preterm and 10 term  
340 and mice). **G)** Preterm mice show a significantly flatter slope of log transformed 2-70 Hz power.  
341 Linear regression; slope and  $r^2$  values are indicated. Data shown as mean or mean $\pm$ SEM.

342 **Figure 3. Preterm mice show elevated inhibition in the visual cortex. A)** Top: raw LFP trace;  
343 middle: filtered 0.7-7 kHz LFP; bottom: identified single units. **B)** Preterm mice have a significantly  
344 reduced firing rate of neurons in the visual cortex during the presentation of a blank grey screen. 239  
345 units from  $N=5$  term and 6 preterm mice, nested t-test,  $t(9)=2.428$ ,  $p=.038$ . Data shown as mean or  
346 mean $\pm$ SEM. **C)** Immunohistochemical detection of NeuN (yellow) and GAD65/67 (cyan) in the  
347 visual cortex of term and preterm mice. Arrowheads: putative inhibitory synapses. **D)** Cumulative  
348 frequency distribution of puncta size in term and preterm mice shows a significant shift to the right in  
349 term mice, signifying increased puncta size across all synaptic populations. Kolmogorov-Smirnov  
350 test,  $p<.001$ . Minimum 100 NeuN cell bodies/mouse from  $N=5$  preterm and 6 term mice. **E)**  
351 Representative maximum projections of brain sections stained for Parvalbumin and quantified for  
352 Parvalbumin intensity. **F)** Cumulative distribution of Parvalbumin intensity measurements from. The  
353 curve in preterm mice is shifter to the right, demonstrating the significantly increased intensity of  
354 Parvalbumin staining in preterm mice.  $N=477$  and 636 cell bodies from 3 preterm and 6 term mice,  
355 respectively. Kolmogorov-Smirnov test,  $p<.001$ .

356 Bibliography

- 357 1. Blencowe H, Cousens S, Oestergaard MZ, Chou D, Moller A-B, Narwal R, et al. National,  
358 regional, and worldwide estimates of preterm birth rates in the year 2010 with time trends since  
359 1990 for selected countries: a systematic analysis and implications. *Lancet*. 2012 Jun  
360 9;379(9832):2162–2172.
- 361 2. Blencowe H, Lee ACC, Cousens S, Bahalim A, Narwal R, Zhong N, et al. Preterm birth-  
362 associated neurodevelopmental impairment estimates at regional and global levels for 2010.  
363 *Pediatr Res*. 2013 Dec;74 Suppl 1:17–34.
- 364 3. Barfield WD. Public health implications of very preterm birth. *Clin Perinatol*. 2018  
365 Sep;45(3):565–577.
- 366 4. Limperopoulos C, Bassan H, Gauvreau K, Robertson RL, Sullivan NR, Benson CB, et al. Does  
367 cerebellar injury in premature infants contribute to the high prevalence of long-term cognitive,  
368 learning, and behavioral disability in survivors? *Pediatrics*. 2007 Sep;120(3):584–593.
- 369 5. Ortinau C, Neil J. The neuroanatomy of prematurity: normal brain development and the impact  
370 of preterm birth. *Clin Anat*. 2015 Mar;28(2):168–183.
- 371 6. Leung MP, Thompson B, Black J, Dai S, Alswailer JM. The effects of preterm birth on visual  
372 development. *Clin Exp Optom*. 2018 Jan;101(1):4–12.
- 373 7. Mann JR, McDermott S, Griffith MI, Hardin J, Gregg A. Uncovering the complex relationship  
374 between pre-eclampsia, preterm birth and cerebral palsy. *Paediatr Perinat Epidemiol*. 2011  
375 Mar;25(2):100–110.
- 376 8. Bouyssi-Kobar M, Brossard-Racine M, Jacobs M, Murnick J, Chang T, Limperopoulos C.  
377 Regional microstructural organization of the cerebral cortex is affected by preterm birth.  
378 *Neuroimage Clin*. 2018 Mar 16;18:871–880.
- 379 9. Bouyssi-Kobar M, du Plessis AJ, McCarter R, Brossard-Racine M, Murnick J, Tinkleman L, et  
380 al. Third trimester brain growth in preterm infants compared with in utero healthy fetuses.  
381 *Pediatrics*. 2016 Nov;138(5).
- 382 10. Pandit AS, Robinson E, Aljabar P, Ball G, Gousias IS, Wang Z, et al. Whole-brain mapping of  
383 structural connectivity in infants reveals altered connection strength associated with growth and  
384 preterm birth. *Cereb Cortex*. 2014 Sep;24(9):2324–2333.
- 385 11. Hunt BAE, Scratch SE, Mossad SI, Emami Z, Taylor MJ, Dunkley BT. Disrupted visual cortex  
386 neurophysiology following very preterm birth. *Biol Psychiatry Cogn Neurosci Neuroimaging*.  
387 2019 Sep 16;
- 388 12. Tokariev A, Stjerna S, Lano A, Metsäranta M, Palva JM, Vanhatalo S. Preterm birth changes  
389 networks of newborn cortical activity. *Cereb Cortex*. 2019 Feb 1;29(2):814–826.
- 390 13. Strang-Karlsson S, Andersson S, Paile-Hyvärinen M, Darby D, Hovi P, Räikkönen K, et al.  
391 Slower reaction times and impaired learning in young adults with birth weight <1500 g.  
392 *Pediatrics*. 2010 Jan;125(1):e74–82.

- 393 14. Treyvaud K, Ure A, Doyle LW, Lee KJ, Rogers CE, Kidokoro H, et al. Psychiatric outcomes at  
394 age seven for very preterm children: rates and predictors. *J Child Psychol Psychiatry*. 2013  
395 Jul;54(7):772–779.
- 396 15. Del Hoyo Soriano L, Rosser T, Hamilton D, Wood T, Abbeduto L, Sherman S. Gestational age  
397 is related to symptoms of attention-deficit/hyperactivity disorder in late-preterm to full-term  
398 children and adolescents with down syndrome. *Sci Rep*. 2020 Nov 23;10(1):20345.
- 399 16. Jaekel J, Wolke D, Bartmann P. Poor attention rather than hyperactivity/impulsivity predicts  
400 academic achievement in very preterm and full-term adolescents. *Psychol Med*. 2013  
401 Jan;43(1):183–196.
- 402 17. Shuffrey LC, Pini N, Potter M, Springer P, Lucchini M, Rayport Y, et al. Aperiodic  
403 electrophysiological activity in preterm infants is linked to subsequent autism risk. *Dev*  
404 *Psychobiol*. 2022 May;64(4):e22271.
- 405 18. Crump C, Sundquist J, Sundquist K. Preterm or early term birth and risk of autism. *Pediatrics*.  
406 2021 Sep;148(3).
- 407 19. McGowan EC, Sheinkopf SJ. Autism and preterm birth: clarifying risk and exploring  
408 mechanisms. *Pediatrics*. 2021 Sep;148(3).
- 409 20. Holmes GL, Lombroso CT. Prognostic value of background patterns in the neonatal EEG. *J*  
410 *Clin Neurophysiol*. 1993 Jul;10(3):323–352.
- 411 21. Rivera MJ, Teruel MA, Maté A, Trujillo J. Diagnosis and prognosis of mental disorders by  
412 means of EEG and deep learning: a systematic mapping study. *Artif Intell Rev*. 2021 Mar 27;
- 413 22. Watanabe K, Hayakawa F, Okumura A. Neonatal EEG: a powerful tool in the assessment of  
414 brain damage in preterm infants. *Brain and Development*. 1999 Sep;21(6):361–372.
- 415 23. McCoy B, Hahn CD. Continuous EEG monitoring in the neonatal intensive care unit. *J Clin*  
416 *Neurophysiol*. 2013 Apr;30(2):106–114.
- 417 24. O’Toole JM, Boylan GB. Quantitative preterm EEG analysis: the need for caution in using  
418 modern data science techniques. *Front Pediatr*. 2019 May 3;7:174.
- 419 25. Schaworonkow N, Voytek B. Longitudinal changes in aperiodic and periodic activity in  
420 electrophysiological recordings in the first seven months of life. *Dev Cogn Neurosci*. 2021  
421 Feb;47:100895.
- 422 26. Gasser T, Verleger R, Bächer P, Sroka L. Development of the EEG of school-age children and  
423 adolescents. I. Analysis of band power. *Electroencephalogr Clin Neurophysiol*. 1988  
424 Feb;69(2):91–99.
- 425 27. Saby JN, Marshall PJ. The utility of EEG band power analysis in the study of infancy and early  
426 childhood. *Dev Neuropsychol*. 2012;37(3):253–273.

- 427 28. Lloyd RO, O'Toole JM, Livingstone V, Filan PM, Boylan GB. Can EEG accurately predict 2-  
428 year neurodevelopmental outcome for preterm infants? *Arch Dis Child Fetal Neonatal Ed.* 2021  
429 Sep;106(5):535–541.
- 430 29. Vanhatalo S, Tallgren P, Andersson S, Sainio K, Voipio J, Kaila K. DC-EEG discloses  
431 prominent, very slow activity patterns during sleep in preterm infants. *Clin Neurophysiol.* 2002  
432 Nov;113(11):1822–1825.
- 433 30. Nishiyori R, Xiao R, Vanderbilt D, Smith BA. Electroencephalography measures of relative  
434 power and coherence as reaching skill emerges in infants born preterm. *Sci Rep.* 2021 Feb  
435 11;11(1):3609.
- 436 31. Nordvik T, Schumacher EM, Larsson PG, Pripp AH, Løhaugen GC, Stiris T. Early spectral  
437 EEG in preterm infants correlates with neurocognitive outcomes in late childhood. *Pediatr Res.*  
438 2022 Oct;92(4):1132–1139.
- 439 32. Zanelli S, Goodkin HP, Kowalski S, Kapur J. Impact of transient acute hypoxia on the  
440 developing mouse EEG. *Neurobiol Dis.* 2014 Aug;68:37–46.
- 441 33. Burnsed J, Skwarzyńska D, Wagley PK, Isbell L, Kapur J. Neuronal Circuit Activity during  
442 Neonatal Hypoxic-Ischemic Seizures in Mice. *Ann Neurol.* 2019 Dec;86(6):927–938.
- 443 34. El-Hayek YH, Wu C, Zhang L. Early suppression of intracranial EEG signals predicts ischemic  
444 outcome in adult mice following hypoxia-ischemia. *Exp Neurol.* 2011 Oct;231(2):295–303.
- 445 35. Johnson KJ, Moy B, Rensing N, Robinson A, Ly M, Chengalvala R, et al. Functional  
446 neuropathology of neonatal hypoxia-ischemia by single-mouse longitudinal  
447 electroencephalography. *Epilepsia.* 2022 Dec;63(12):3037–3050.
- 448 36. Stolp HB, Fleiss B, Arai Y, Supramaniam V, Vontell R, Birtles S, et al. Interneuron  
449 development is disrupted in preterm brains with diffuse white matter injury: observations in  
450 mouse and human. *Front Physiol.* 2019 Jul 30;10:955.
- 451 37. Scheuer T, dem Brinke EA, Grosser S, Wolf SA, Mattei D, Sharkovska Y, et al. Reduction of  
452 cortical parvalbumin-expressing GABAergic interneurons in a rodent hyperoxia model of  
453 preterm birth brain injury with deficits in social behavior and cognition. *Development.* 2021  
454 Oct 15;148(20).
- 455 38. Lacaille H, Vacher C-M, Bakalar D, O'Reilly JJ, Salzbank J, Penn AA. Impaired interneuron  
456 development in a novel model of neonatal brain injury. *eNeuro.* 2019 Feb 22;6(1).
- 457 39. Malik S, Vinukonda G, Vose LR, Diamond D, Bhimavarapu BBR, Hu F, et al. Neurogenesis  
458 continues in the third trimester of pregnancy and is suppressed by premature birth. *J Neurosci.*  
459 2013 Jan 9;33(2):411–423.
- 460 40. Elovitz MA, Mrinalini C. Animal models of preterm birth. *Trends Endocrinol Metab.* 2004  
461 Dec;15(10):479–487.
- 462 41. Dudley DJ, Branch DW, Edwin SS, Mitchell MD. Induction of preterm birth in mice by  
463 RU486. *Biol Reprod.* 1996 Nov;55(5):992–995.

- 464 42. McCarthy R, Martin-Fairey C, Sojka DK, Herzog ED, Jungheim ES, Stout MJ, et al. Mouse  
465 models of preterm birth: suggested assessment and reporting guidelines. *Biol Reprod*. 2018  
466 Nov 1;99(5):922–937.
- 467 43. Chiesa M, Guimond D, Tyzio R, Pons-Bennaceur A, Lozovaya N, Burnashev N, et al. Term or  
468 Preterm Cesarean Section Delivery Does Not Lead to Long-term Detrimental Consequences in  
469 Mice. *Cereb Cortex*. 2019 Jun 1;29(6):2424–2436.
- 470 44. Kiorpes L. The puzzle of visual development: behavior and neural limits. *J Neurosci*. 2016 Nov  
471 9;36(45):11384–11393.
- 472 45. Huttenlocher PR, de Courten C, Garey LJ, Van der Loos H. Synaptogenesis in human visual  
473 cortex--evidence for synapse elimination during normal development. *Neurosci Lett*. 1982 Dec  
474 13;33(3):247–252.
- 475 46. Pinto JGA, Hornby KR, Jones DG, Murphy KM. Developmental changes in GABAergic  
476 mechanisms in human visual cortex across the lifespan. *Front Cell Neurosci*. 2010 Jun 10;4:16.
- 477 47. Haak KV, Morland AB, Engel SA. Plasticity, and its limits, in adult human primary visual  
478 cortex. *Multisens Res*. 2015;28(3-4):297–307.
- 479 48. Norcia AM, Tyler CW, Piecuch R, Clyman R, Grobstein J. Visual acuity development in  
480 normal and abnormal preterm human infants. *J Pediatr Ophthalmol Strabismus*. 1987  
481 Apr;24(2):70–74.
- 482 49. Lunghi C, Burr DC, Morrone C. Brief periods of monocular deprivation disrupt ocular balance  
483 in human adult visual cortex. *Curr Biol*. 2011 Jul 26;21(14):R538–9.
- 484 50. Mitchell DE, Maurer D. Critical periods in vision revisited. *Annu Rev Vis Sci*. 2022 Sep  
485 15;8:291–321.
- 486 51. Shen J, Colonnese MT. Development of activity in the mouse visual cortex. *J Neurosci*. 2016  
487 Nov 30;36(48):12259–12275.
- 488 52. Colonnese MT, Kaminska A, Minlebaev M, Milh M, Bloem B, Lescure S, et al. A conserved  
489 switch in sensory processing prepares developing neocortex for vision. *Neuron*. 2010 Aug  
490 12;67(3):480–498.
- 491 53. Antonini A, Fagiolini M, Stryker MP. Anatomical correlates of functional plasticity in mouse  
492 visual cortex. *J Neurosci*. 1999 Jun 1;19(11):4388–4406.
- 493 54. Puglia MH, Slobin JS, Williams CL. The automated preprocessing pipe-line for the estimation  
494 of scale-wise entropy from EEG data (APPLESEED): Development and validation for use in  
495 pediatric populations. *Dev Cogn Neurosci*. 2022 Dec;58:101163.
- 496 55. Delorme A, Makeig S. EEGLAB: an open source toolbox for analysis of single-trial EEG  
497 dynamics including independent component analysis. *J Neurosci Methods*. 2004 Mar  
498 15;134(1):9–21.

- 499 56. Debnath R, Buzzell GA, Morales S, Bowers ME, Leach SC, Fox NA. The Maryland analysis of  
500 developmental EEG (MADE) pipeline. *Psychophysiology*. 2020 Jun;57(6):e13580.
- 501 57. Mognon A, Jovicich J, Bruzzone L, Buiatti M. ADJUST: An automatic EEG artifact detector  
502 based on the joint use of spatial and temporal features. *Psychophysiology*. 2011 Feb;48(2):229–  
503 240.
- 504 58. Nolan H, Whelan R, Reilly RB. FASTER: Fully Automated Statistical Thresholding for EEG  
505 artifact Rejection. *J Neurosci Methods*. 2010 Sep 30;192(1):152–162.
- 506 59. Goswami S, Cavalier S, Sridhar V, Huber KM, Gibson JR. Local cortical circuit correlates of  
507 altered EEG in the mouse model of Fragile X syndrome. *Neurobiol Dis*. 2019 Apr;124:563–  
508 572.
- 509 60. Chokron S, Kovarski K, Dutton GN. Cortical visual impairments and learning disabilities.  
510 *Front Hum Neurosci*. 2021 Oct 13;15:713316.
- 511 61. Macintyre-Béon C, Young D, Dutton GN, Mitchell K, Simpson J, Loffler G, et al. Cerebral  
512 visual dysfunction in prematurely born children attending mainstream school. *Doc Ophthalmol*.  
513 2013 Oct;127(2):89–102.
- 514 62. Spierer A, Rozman Z, Kuint J. Visual acuity in premature infants. *Ophthalmologica*. 2004  
515 Dec;218(6):397–401.
- 516 63. Edmond JC, Foroozan R. Cortical visual impairment in children. *Curr Opin Ophthalmol*. 2006  
517 Dec;17(6):509–512.
- 518 64. Weinstein JM, Gilmore RO, Shaikh SM, Kunselman AR, Trescher WV, Tashima LM, et al.  
519 Defective motion processing in children with cerebral visual impairment due to periventricular  
520 white matter damage. *Dev Med Child Neurol*. 2012 Jul;54(7):e1–8.
- 521 65. Emberson LL, Boldin AM, Riccio JE, Guillet R, Aslin RN. Deficits in Top-Down Sensory  
522 Prediction in Infants At Risk due to Premature Birth. *Curr Biol*. 2017 Feb 6;27(3):431–436.
- 523 66. Fazzi E, Galli J, Micheletti S. Visual impairment: A common sequela of preterm birth.  
524 *Neoreviews*. 2012 Sep 1;13(9):e542–e550.
- 525 67. Ben Amor L, Chantal S, Bairam A. Relationship between late preterm birth and expression of  
526 attention-deficit hyperactivity disorder in school-aged children: clinical, neuropsychological,  
527 and neurobiochemical outcomes. *RRN*. 2012 Aug;77.
- 528 68. de Kieviet JF, van Elburg RM, Lafeber HN, Oosterlaan J. Attention problems of very preterm  
529 children compared with age-matched term controls at school-age. *J Pediatr*. 2012  
530 Nov;161(5):824–829.
- 531 69. Fawcett SL, Wang Y-Z, Birch EE. The critical period for susceptibility of human stereopsis.  
532 *Invest Ophthalmol Vis Sci*. 2005 Feb;46(2):521–525.
- 533 70. Freeman RD, Ohzawa I. Development of binocular vision in the kitten's striate cortex. *J*  
534 *Neurosci*. 1992 Dec;12(12):4721–4736.

- 535 71. Jandó G, Mikó-Baráth E, Markó K, Hollódy K, Török B, Kovacs I. Early-onset binocularity in  
536 preterm infants reveals experience-dependent visual development in humans. *Proc Natl Acad*  
537 *Sci USA*. 2012 Jul 3;109(27):11049–11052.
- 538 72. Gyurkovics M, Clements GM, Low KA, Fabiani M, Gratton G. Stimulus-induced changes in  
539 1/f-like background activity in EEG. *J Neurosci*. 2022 Aug 12;42(37):7144–7151.
- 540 73. Toda T, Homma D, Tokuoka H, Hayakawa I, Sugimoto Y, Ichinose H, et al. Birth regulates the  
541 initiation of sensory map formation through serotonin signaling. *Dev Cell*. 2013 Oct  
542 14;27(1):32–46.
- 543 74. Altigani M, Murphy JF, Newcombe RG, Gray OP. Catch up growth in preterm infants. *Acta*  
544 *Paediatr Scand Suppl*. 1989;357:3–19.
- 545 75. Ribic A, Crair MC, Biederer T. Synapse-Selective Control of Cortical Maturation and Plasticity  
546 by Parvalbumin-Autonomous Action of SynCAM 1. *Cell Rep*. 2019 Jan 8;26(2):381–393.e6.
- 547 76. Wang B-S, Sarnaik R, Cang J. Critical period plasticity matches binocular orientation  
548 preference in the visual cortex. *Neuron*. 2010 Jan 28;65(2):246–256.
- 549 77. Toyozumi T, Miyamoto H, Yazaki-Sugiyama Y, Atapour N, Hensch TK, Miller KD. A theory  
550 of the transition to critical period plasticity: inhibition selectively suppresses spontaneous  
551 activity. *Neuron*. 2013 Oct 2;80(1):51–63.
- 552 78. Chattopadhyaya B, Di Cristo G, Wu CZ, Knott G, Kuhlman S, Fu Y, et al. GAD67-mediated  
553 GABA synthesis and signaling regulate inhibitory synaptic innervation in the visual cortex.  
554 *Neuron*. 2007 Jun 21;54(6):889–903.
- 555 79. Gogolla N, Takesian AE, Feng G, Fagiolini M, Hensch TK. Sensory integration in mouse  
556 insular cortex reflects GABA circuit maturation. *Neuron*. 2014 Aug 20;83(4):894–905.
- 557 80. Carcea I, Patil SB, Robison AJ, Mesias R, Huntsman MM, Froemke RC, et al. Maturation of  
558 cortical circuits requires Semaphorin 7A. *Proc Natl Acad Sci USA*. 2014 Sep  
559 23;111(38):13978–13983.
- 560 81. Pfeffer CK, Xue M, He M, Huang ZJ, Scanziani M. Inhibition of inhibition in visual cortex: the  
561 logic of connections between molecularly distinct interneurons. *Nat Neurosci*. 2013  
562 Aug;16(8):1068–1076.
- 563 82. Panda S, Dohare P, Jain S, Parikh N, Singla P, Mehdizadeh R, et al. Estrogen Treatment  
564 Reverses Prematurity-Induced Disruption in Cortical Interneuron Population. *J Neurosci*. 2018  
565 Aug 22;38(34):7378–7391.
- 566 83. Donato F, Rompani SB, Caroni P. Parvalbumin-expressing basket-cell network plasticity  
567 induced by experience regulates adult learning. *Nature*. 2013 Dec 12;504(7479):272–276.
- 568 84. Tierney A, Strait DL, O’Connell S, Kraus N. Developmental changes in resting gamma power  
569 from age three to adulthood. *Clin Neurophysiol*. 2013 May;124(5):1040–1042.

- 570 85. Reh RK, Dias BG, Nelson CA, Kaufer D, Werker JF, Kolb B, et al. Critical period regulation  
571 across multiple timescales. *Proc Natl Acad Sci USA*. 2020 Sep 22;117(38):23242–23251.
- 572 86. Arpino C, Compagnone E, Montanaro ML, Cacciatore D, De Luca A, Cerulli A, et al. Preterm  
573 birth and neurodevelopmental outcome: a review. *Childs Nerv Syst*. 2010 Sep;26(9):1139–  
574 1149.
- 575 87. Johnson S, Marlow N. Preterm birth and childhood psychiatric disorders. *Pediatr Res*. 2011  
576 May;69(5 Pt 2):11R–8R.
- 577 88. Ribic A. Stability in the Face of Change: Lifelong Experience-Dependent Plasticity in the  
578 Sensory Cortex. *Front Cell Neurosci*. 2020 Apr 21;14:76.
- 579 89. Ye Q, Miao Q-L. Experience-dependent development of perineuronal nets and chondroitin  
580 sulfate proteoglycan receptors in mouse visual cortex. *Matrix Biol*. 2013 Aug 8;32(6):352–363.
- 581 90. Guan W, Cao J-W, Liu L-Y, Zhao Z-H, Fu Y, Yu Y-C. Eye opening differentially modulates  
582 inhibitory synaptic transmission in the developing visual cortex. *Elife*. 2017 Dec 11;6.
- 583 91. Komitova M, Xenos D, Salmaso N, Tran KM, Brand T, Schwartz ML, et al. Hypoxia-induced  
584 developmental delays of inhibitory interneurons are reversed by environmental enrichment in  
585 the postnatal mouse forebrain. *J Neurosci*. 2013 Aug 14;33(33):13375–13387.
- 586 92. van der Kooij MA, Ohl F, Arndt SS, Kavelaars A, van Bel F, Heijnen CJ. Mild neonatal  
587 hypoxia-ischemia induces long-term motor- and cognitive impairments in mice. *Brain Behav*  
588 *Immun*. 2010 Jul;24(5):850–856.
- 589 93. Salmaso N, Jablonska B, Scafidi J, Vaccarino FM, Gallo V. Neurobiology of premature brain  
590 injury. *Nat Neurosci*. 2014 Mar;17(3):341–346.
- 591 94. Castillo-Ruiz A, Hite TA, Yakout DW, Rosen TJ, Forger NG. Does birth trigger cell death in  
592 the developing brain? *eNeuro*. 2020 Feb 14;7(1).
- 593 95. Lacaille H, Vacher C-M, Penn AA. Preterm birth alters the maturation of the gabaergic system  
594 in the human prefrontal cortex. *Front Mol Neurosci*. 2021;14:827370.
- 595 96. Tibrewal M, Cheng B, Dohare P, Hu F, Mehdizadeh R, Wang P, et al. Disruption of  
596 Interneuron Neurogenesis in Premature Newborns and Reversal with Estrogen Treatment. *J*  
597 *Neurosci*. 2018 Jan 31;38(5):1100–1113.
- 598 97. Karnati S, Kollikonda S, Abu-Shaweesh J. Late preterm infants - Changing trends and  
599 continuing challenges. *Int J Pediatr Adolesc Med*. 2020 Mar;7(1):36–44.
- 600 98. Shapiro-Mendoza CK, Lackritz EM. Epidemiology of late and moderate preterm birth. *Semin*  
601 *Fetal Neonatal Med*. 2012 Jun;17(3):120–125.
- 602 99. Semple BD, Blomgren K, Gimlin K, Ferriero DM, Noble-Haeusslein LJ. Brain development in  
603 rodents and humans: Identifying benchmarks of maturation and vulnerability to injury across  
604 species. *Prog Neurobiol*. 2013 Aug;106-107:1–16.

605





**A**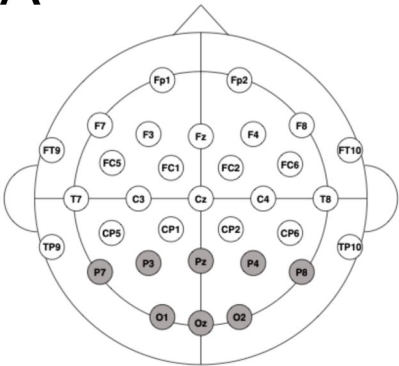**B**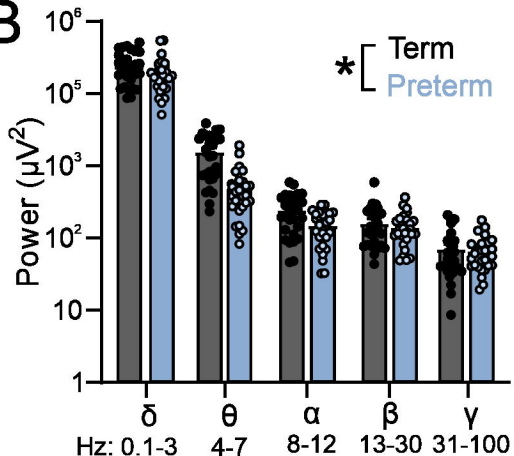**C**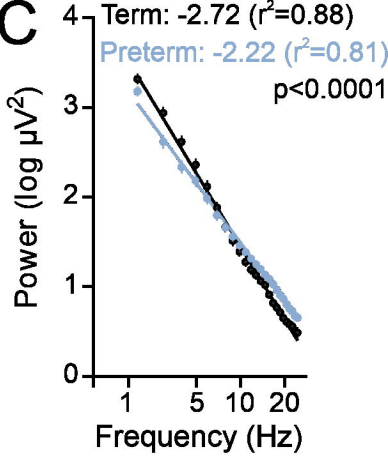

**A**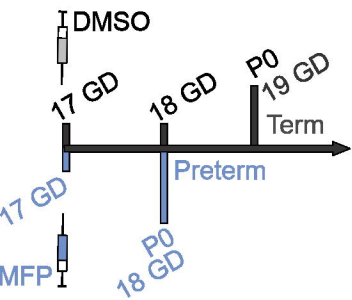**B**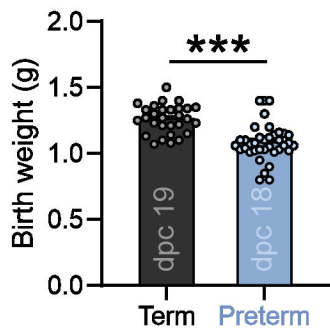**C**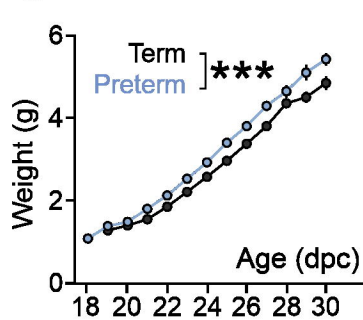**D**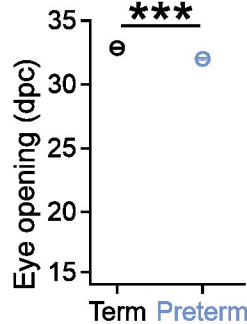**E**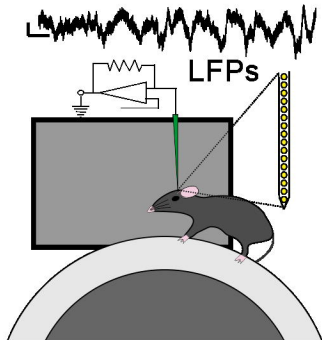**F**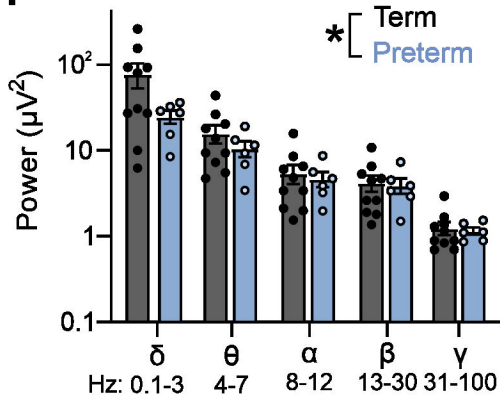**G**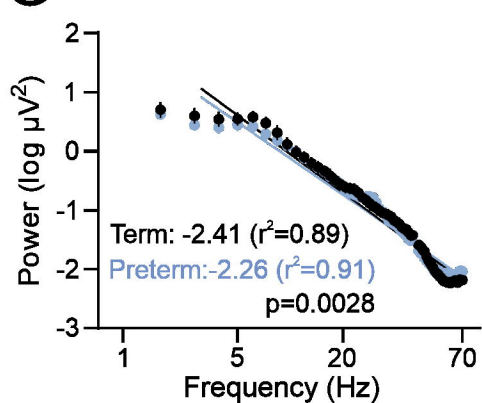

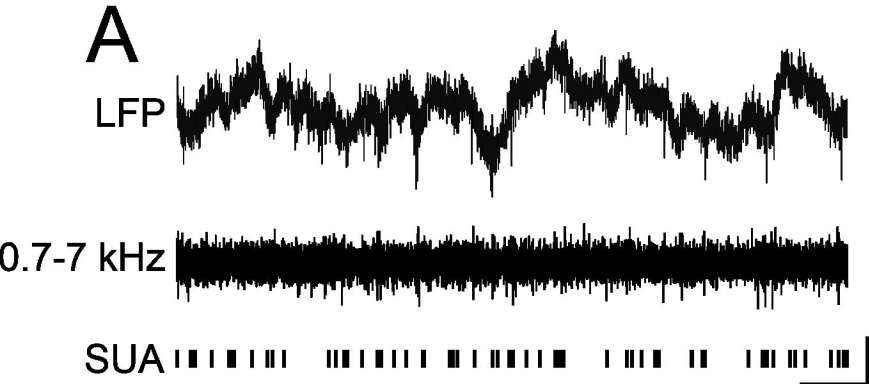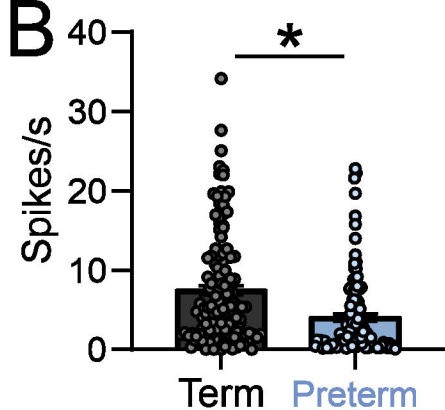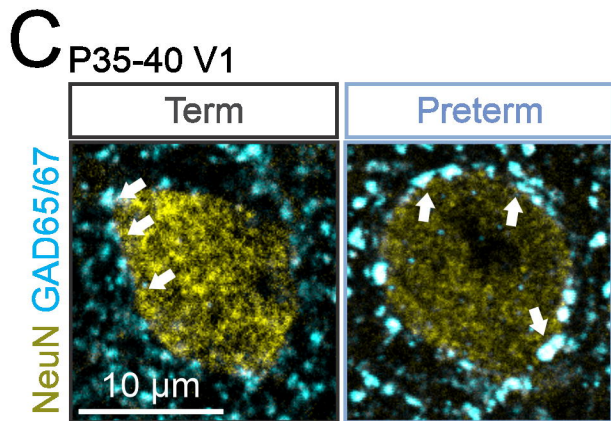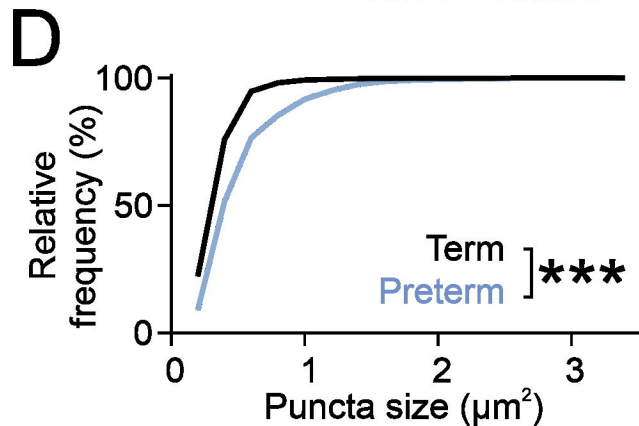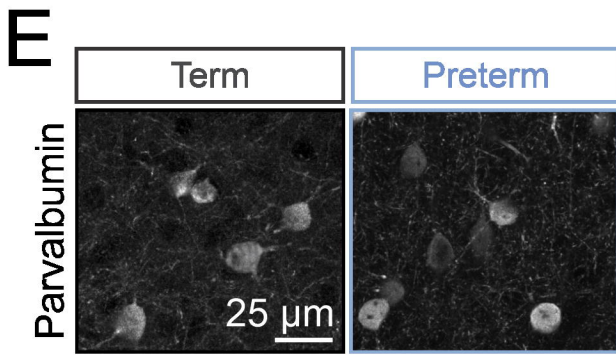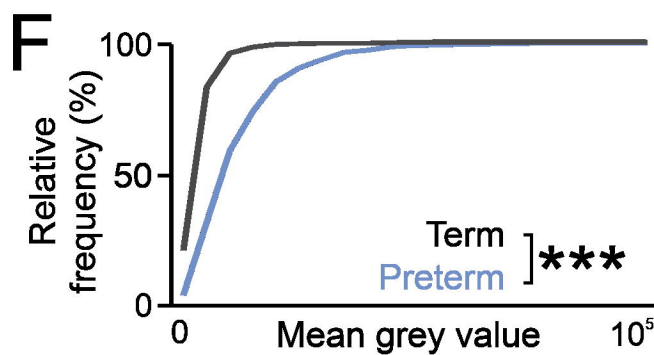

Source: https://www.biorxiv.org/content/10.1101/2023.01.20.524993v1.full.pdf
